# Supplementary material
Source: Springer Nature journal article supplement (https://www.springermedizin.de/resource/supplementary/12876_2011_632_MOESM2_ESM.pdf/9437414)

Funnel plot with pseudo 95% confidence limits

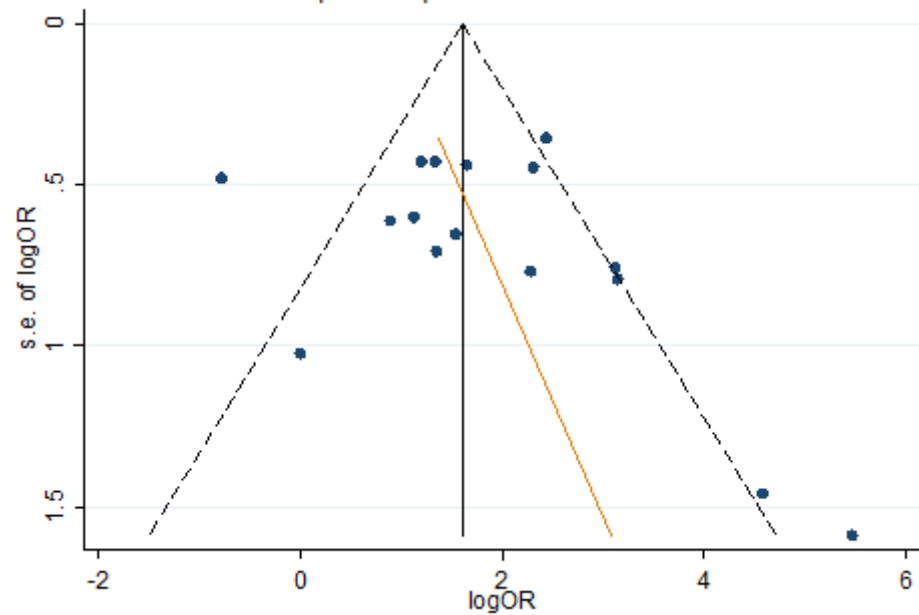

Supplement: MOESM2 [file 9437414]
